# Supplementary material for: The Correlations between Clinical Features, Dermoscopic and Histopathological Findings, and Treatment Outcomes of Patients with Pitted Keratolysis
Source: Hindawi journal article supplement (doi:10.1155/2021/3416643), 2021-01-01

**Supplementary figure 1.** The characteristics of each dermoscopic finding

**White opaque**

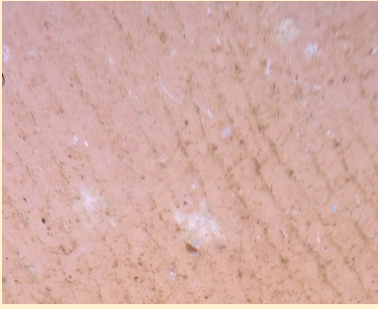

**Black or brown opaque**

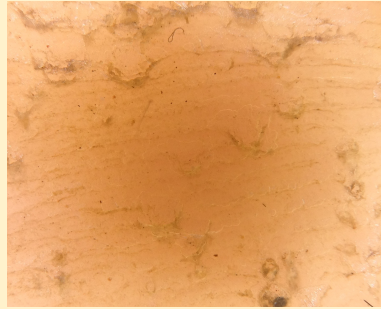

**Pit**

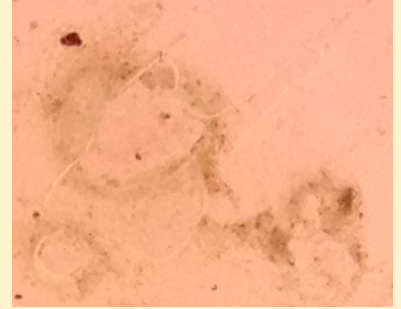

**Characteristics of pits**

**1. Size**

**Same size**

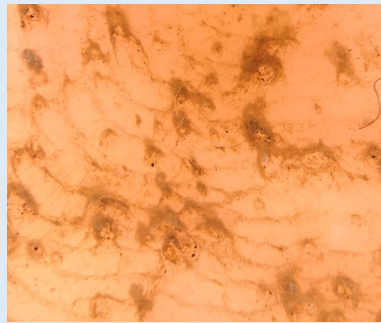

**Mixed size**

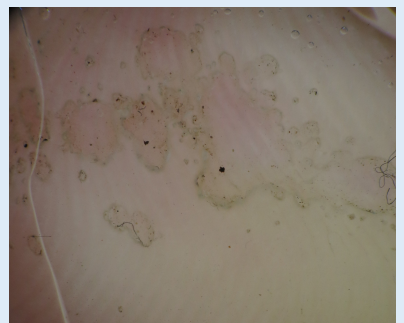

**2. Configuration**

**Same configuration**

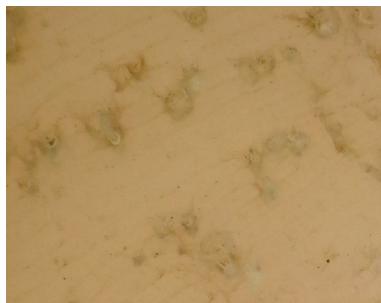

**Mixed configuration**

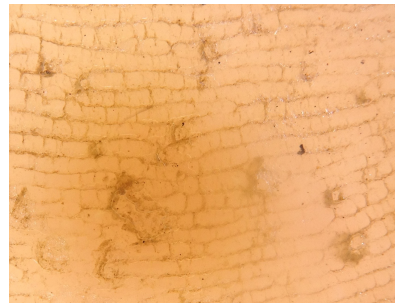

**3. Arrangement**

**Scatter arrangement**

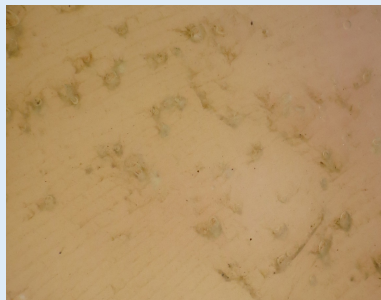

**Cluster arrangement**

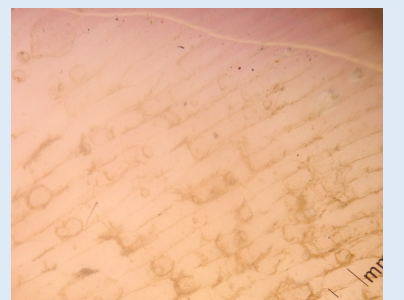

**4. Others**

**Geometrics**

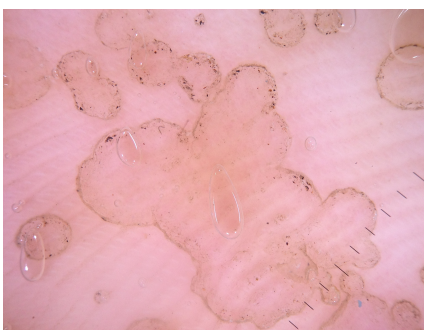

**Interrupted demographic lines**

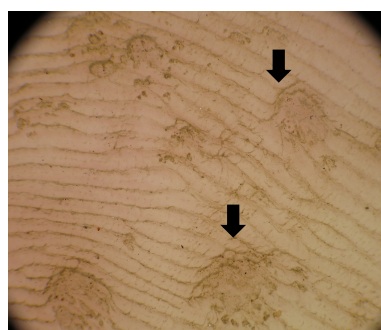

**Bead signs**

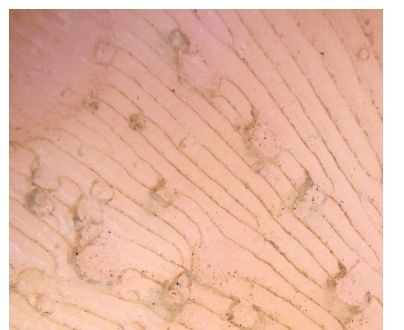

Supplement: f1 [file 3416643.f1.pdf]
